# Supplementary material for: “On-water” rhodium-catalysed hydroformylation for the production of linear alcohols
Source: Royal Society of Chemistry journal article supplement (doi:10.1039/c2cy00450j), 2011-12-21
Supplement: c2cy00450j.pdf [file c2cy00450j.pdf]

## SUPPLEMENTARY MATERIAL

for

“On-Water” Rhodium-Catalysed Hydroformylation for the Production of Linear Alcohols.

Olivier Diebolt<sup>a</sup>, Christian Müller<sup>a</sup>, Dieter Vogt<sup>a\*</sup>

<sup>a</sup> *Schuit Institute of Catalysis, Laboratory of Homogeneous Catalysis, Eindhoven University of Technology, P.O. Box 513, 5600 MB Eindhoven (The Netherlands), Fax: (+31)40-245-5054, [d.vogt@tue.nl](mailto:d.vogt@tue.nl)*

---

\* Dieter Vogt. Tel.: +31.40.247.2730; fax: +31.40.245.5054.; e-mail: o.vogt@tue.nl

## Table of content

|                                                                                |     |
|--------------------------------------------------------------------------------|-----|
| <b>Experimental details</b>                                                    | S2  |
| <b>Calibration curves</b>                                                      | S3  |
| <b>Nonanal reduction using P<sup>n</sup>Bu<sub>3</sub> and PPh<sub>3</sub></b> | S4  |
| <b>Nonanal reduction using Ru<sub>3</sub>(CO)<sub>12</sub> / Xantphos</b>      | S5  |
| <b>Reaction profile of reaction Table 2, entry 1, Table 3, entry 1</b>         | S6  |
| <b>Reaction profile of reaction Table 2, entry 2</b>                           | S7  |
| <b>Gas chromatogram reaction Table 2, entry 3</b>                              | S8  |
| <b>Reaction profile of reaction Table 3, entries 3 and 4</b>                   | S9  |
| <b>Reaction profile of reaction Table 3, entry 5</b>                           | S10 |
| <b>Reaction profile of reaction Table 3, entry 6</b>                           | S11 |
| <b>Reaction profile of reaction Table 3, entry 7</b>                           | S12 |
| <b>Reaction profile of reaction Table 3, entries 8-9</b>                       | S13 |
| <b>Reaction profile of reaction Table 3, entries 10-11</b>                     | S14 |
| <b>Parameter screening for cobalt-catalysed hydroformylation</b>               | S15 |

## Experimental details

### *General:*

Gas chromatography (GC) analyses were performed on a Shimadzu GC-17A gas chromatograph equipped with a flame ionization detector (FID) on an Ultra-2 column (HP?) (25 m, 200  $\mu\text{m}$ , film thickness: 0.33  $\mu\text{m}$ ).

### Method:

80°C to 280°C with a slope of 10°C min<sup>-1</sup>, then holding the temperature at 280°C for 2 min.

1-octene (Aldrich) was distilled before use. Ethanol and isopropanol were dried on molecular sieves and degassed before use. Rhodium sources were purchased from commercial sources, stored under argon and used as received.

### *General procedure for nonanal hydrogenation:*

Reactions were performed in home-made 10 mL autoclaves equipped with a magnetic stirrer bar. The autoclave was charged with [Rh(CO)<sub>2</sub>(acac)] (10  $\mu\text{mol}$ ; cod = 1,5-cyclooctadiene), alkene (2 mmol, S/Rh=200) and ligand (30  $\mu\text{mol}$ , L/Rh= 3 for Xantphos; 40  $\mu\text{mol}$ , L/Rh = 4 for PBU<sub>3</sub>) and the desired solvent under argon atmosphere. The autoclave was purged three times with H<sub>2</sub> (P=10 bar) to remove the remaining argon from the autoclave. Subsequently, the autoclave was pressurised with CO and H<sub>2</sub> to the desired pressure and heated to reaction temperature using an oil bath. After a certain reaction time, the autoclave was cooled to room temperature. One drop of the reaction mixture was extracted with ether, the organic phase poured into a GC vial, diluted with dichloromethane and analysed by GC.

### *General procedure for 1-octene hydroformylation-hydrogenation:*

The reaction profiles were obtained using a home-made magnetically stirred 75 mL autoclave equipped with a high pressure sampling system. The solids were introduced first into the autoclave, previously purged with argon, after which the liquids were added (solvent, 1-octene, P<sup>n</sup>Bu<sub>3</sub>). The autoclave was then purged three times with H<sub>2</sub> (P=10 bar) to remove the remaining argon. Subsequently, the autoclave was pressurised with CO and H<sub>2</sub> to the desired pressure and heated to reaction temperature. Samples were taken out regularly and analysed by GC.

When using Xantphos as ligand, the solvent (water-isopropanol mixtures) did not need to be degassed, the reaction giving similar results with non-degassed solvents.

## Calibration curves. Internal standard is n-dodecane

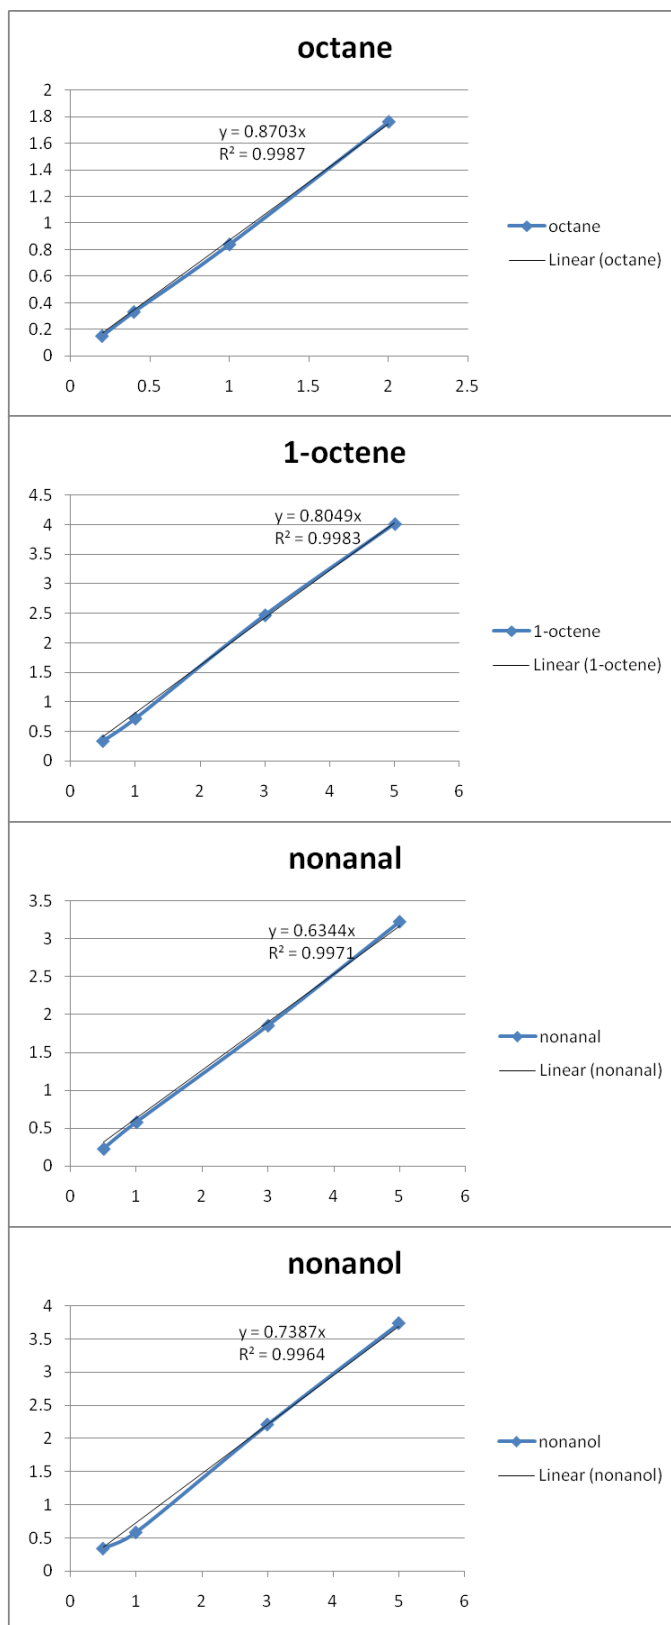

### Nonanal reduction using PBu<sub>3</sub> as ligand

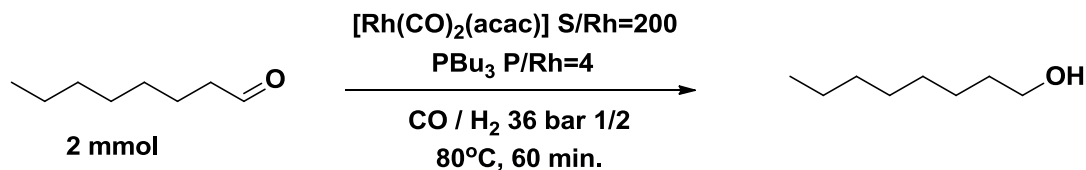

| entry | solvent                          | conversion | alcohol selectivity (%) |
|-------|----------------------------------|------------|-------------------------|
| 1     | MeOH                             | 61.7       | 5.7 <sup>a</sup>        |
| 2     | H <sub>2</sub> O/MeOH <b>1/1</b> | 7.3        | >98                     |
| 3     | H <sub>2</sub> O/MeOH <b>3/1</b> | 62.2       | >98                     |
| 4     | H <sub>2</sub> O/MeOH <b>9/1</b> | 42.0       | >98                     |

<sup>a</sup> 36.1% of 1,1'-dimethoxynonane was formed.

### Nonanal reduction using PPh<sub>3</sub> as ligand

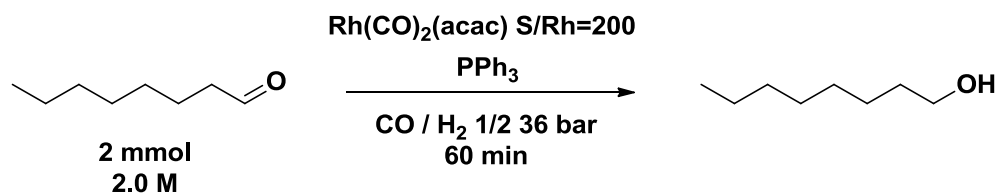

| entry | solvent                              | P/Rh ratio | T          | conversion | alcohol selectivity (%) <sup>b</sup> | catalyst decomposition <sup>a</sup> |
|-------|--------------------------------------|------------|------------|------------|--------------------------------------|-------------------------------------|
| 1     | H <sub>2</sub> O/MeOH 3/1            | 5          | <b>110</b> | 13.2       | 68.1                                 | No                                  |
| 2     | H <sub>2</sub> O/MeOH 3/1            | 5          | <b>130</b> | 13.8       | 61.7                                 | Yes                                 |
| 3     | H <sub>2</sub> O/MeOH 3/1            | 5          | <b>150</b> | 75.0       | 7.5                                  | Yes                                 |
| 4     | <b>MeOH</b>                          | 5          | 110        | 11.0       | 46.2                                 | No                                  |
| 5     | <b>H<sub>2</sub>O/MeOH 1/1</b>       | 5          | 110        | 14.3       | 44.7                                 | No                                  |
| 6     | <b>H<sub>2</sub>O/MeOH 9/1</b>       | 5          | 110        | 27.4       | 18.0                                 | No                                  |
| 7     | H <sub>2</sub> O/ <b>EtOH</b> 3/1    | 5          | 110        | 6.6        | 61.7                                 | Yes                                 |
| 8     | H <sub>2</sub> O/ <b>iPrOH</b> 3/1   | 5          | 110        | 6.1        | 48.1                                 | Yes                                 |
| 9     | H <sub>2</sub> O/ <b>toluene</b> 3/1 | 5          | 110        | 7.2        | 31.4                                 | Yes                                 |
| 10    | H <sub>2</sub> O/MeOH 3/1            | 5          | <b>90</b>  | 13.6       | 57.3                                 | No                                  |
| 11    | H <sub>2</sub> O/MeOH 3/1            | <b>10</b>  | 90         | 8.2        | 35.7                                 | No                                  |
| 12    | H <sub>2</sub> O/MeOH 3/1            | <b>10</b>  | 110        | 20.0       | 54.9                                 | Yes                                 |
| 13    | H <sub>2</sub> O/MeOH 3/1            | <b>20</b>  | 110        | 15.4       | 55.4                                 | Yes                                 |
| 14    | H <sub>2</sub> O/MeOH 3/1            | <b>30</b>  | 110        | 13.5       | 71.8                                 | No                                  |
| 15    | H <sub>2</sub> O/MeOH 3/1            | <b>50</b>  | 110        | 11.6       | 64.9                                 | No                                  |

<sup>a</sup> acetals are present as traces and mainly aldol condensation products are formed. <sup>b</sup> black colloidal solution obtained at the end of the reaction.

## Nonanal reduction using $\text{Ru}_3(\text{CO})_{12}$ / Xantphos

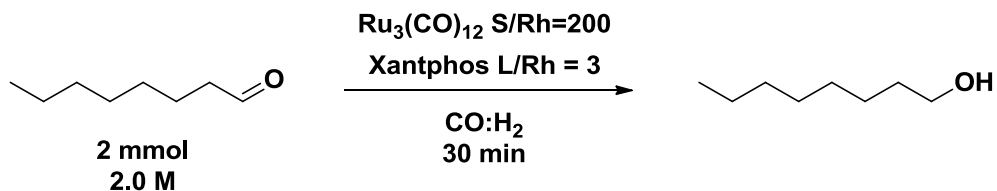

| entry | T (°C)     | P (CO/H <sub>2</sub> ) | solvent                             | Alcohol yield | Acetal yield |
|-------|------------|------------------------|-------------------------------------|---------------|--------------|
| 1     | 110        | <b>20 (0/20)</b>       | iPrOH                               | <b>78</b>     | < <b>0.2</b> |
| 2     | 110        | <b>36 (12/24)</b>      | iPrOH                               | <b>0.4</b>    | < <b>0.2</b> |
| 3     | <b>140</b> | 36 (12/24)             | iPrOH                               | <b>0.5</b>    | <b>0.3</b>   |
| 4     | <b>160</b> | 36 (12/24)             | <b>iPrOH</b>                        | <b>1.8</b>    | <b>3.5</b>   |
| 5     | 160        | 36 (12/24)             | <b>iPrOH/H<sub>2</sub>O (9/1)</b>   | <b>5.4</b>    | <b>2</b>     |
| 6     | 160        | 36 (12/24)             | <b>iPrOH/H<sub>2</sub>O (1/1)</b>   | <b>6.9</b>    | <b>0.9</b>   |
| 7     | 160        | 36 (12/24)             | <b>iPrOH/H<sub>2</sub>O (1/9)</b>   | <b>17.4</b>   | <b>0.4</b>   |
| 8     | 160        | 36 (12/24)             | <b>MeOH/H<sub>2</sub>O (1/9)</b>    | <b>21.8</b>   | <b>0</b>     |
| 9     | 160        | 36 (12/24)             | <b>toluene/H<sub>2</sub>O (1/9)</b> | <b>23</b>     | /            |
| 10    | 160        | 36 (12/24)             | <b>EtOH/H<sub>2</sub>O (1/9)</b>    | <b>46.4</b>   | <b>0</b>     |
| 11    | 160        | 36 (12/24)             | <b>tAmOH/H<sub>2</sub>O (1/9)</b>   | <b>29.2</b>   | <b>0</b>     |
| 12    | 160        | 36 (12/24)             | <b>THF/H<sub>2</sub>O (1/9)</b>     | <b>28.4</b>   | /            |
| 13    | 160        | 36 (12/24)             | <b>H<sub>2</sub>O</b>               | <b>29.8</b>   | /            |

### Reaction profile of reaction Table 2, entry 1, Table 3, entry 1.

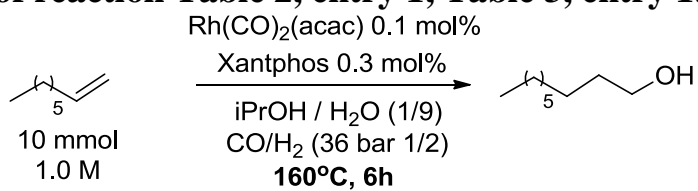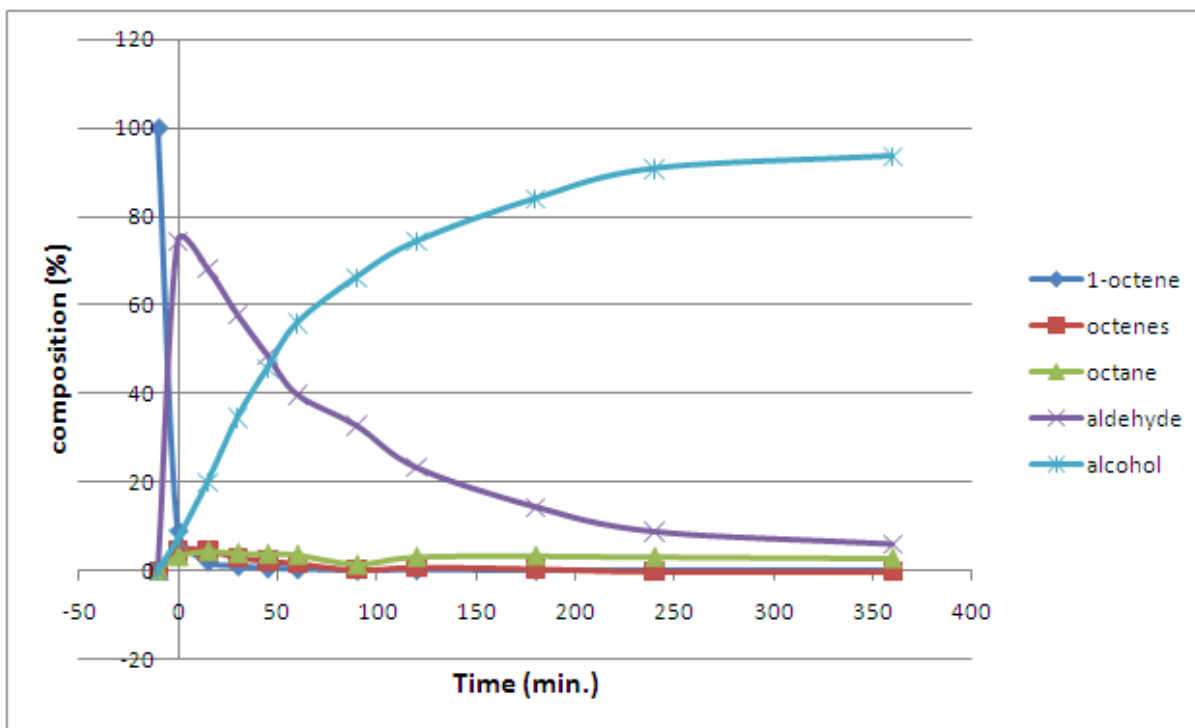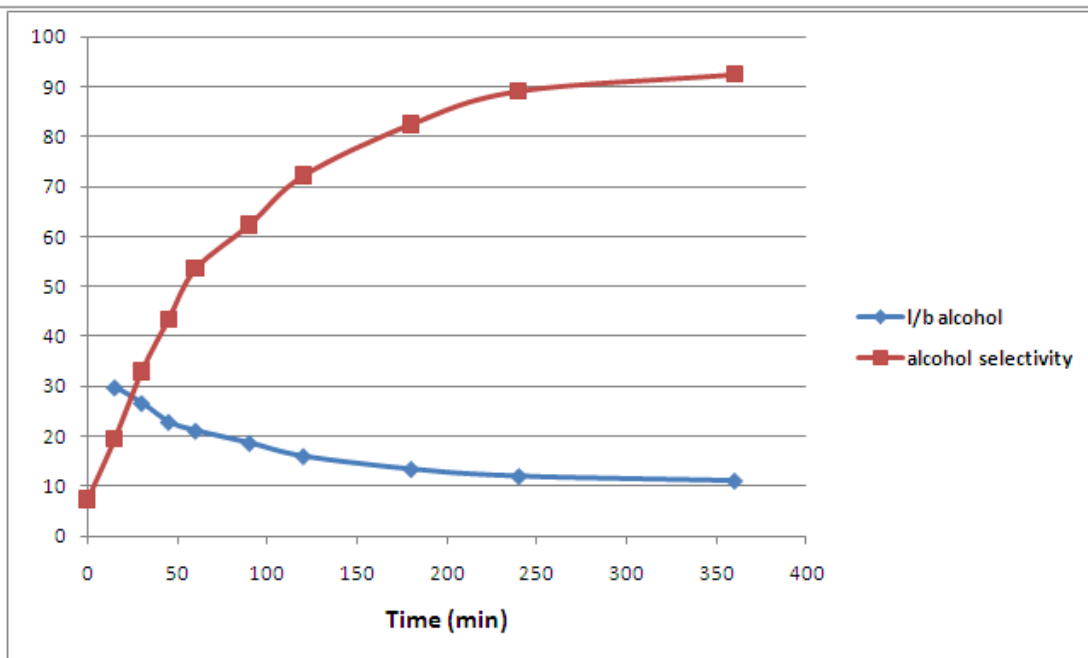

## Reaction profile of reaction Table 2, entry 2.

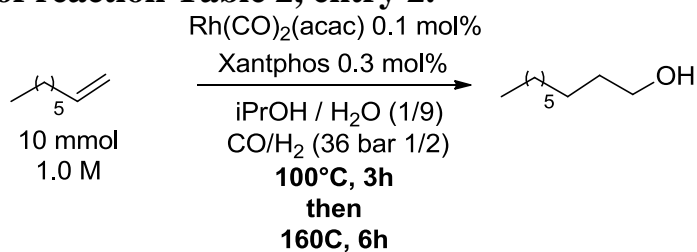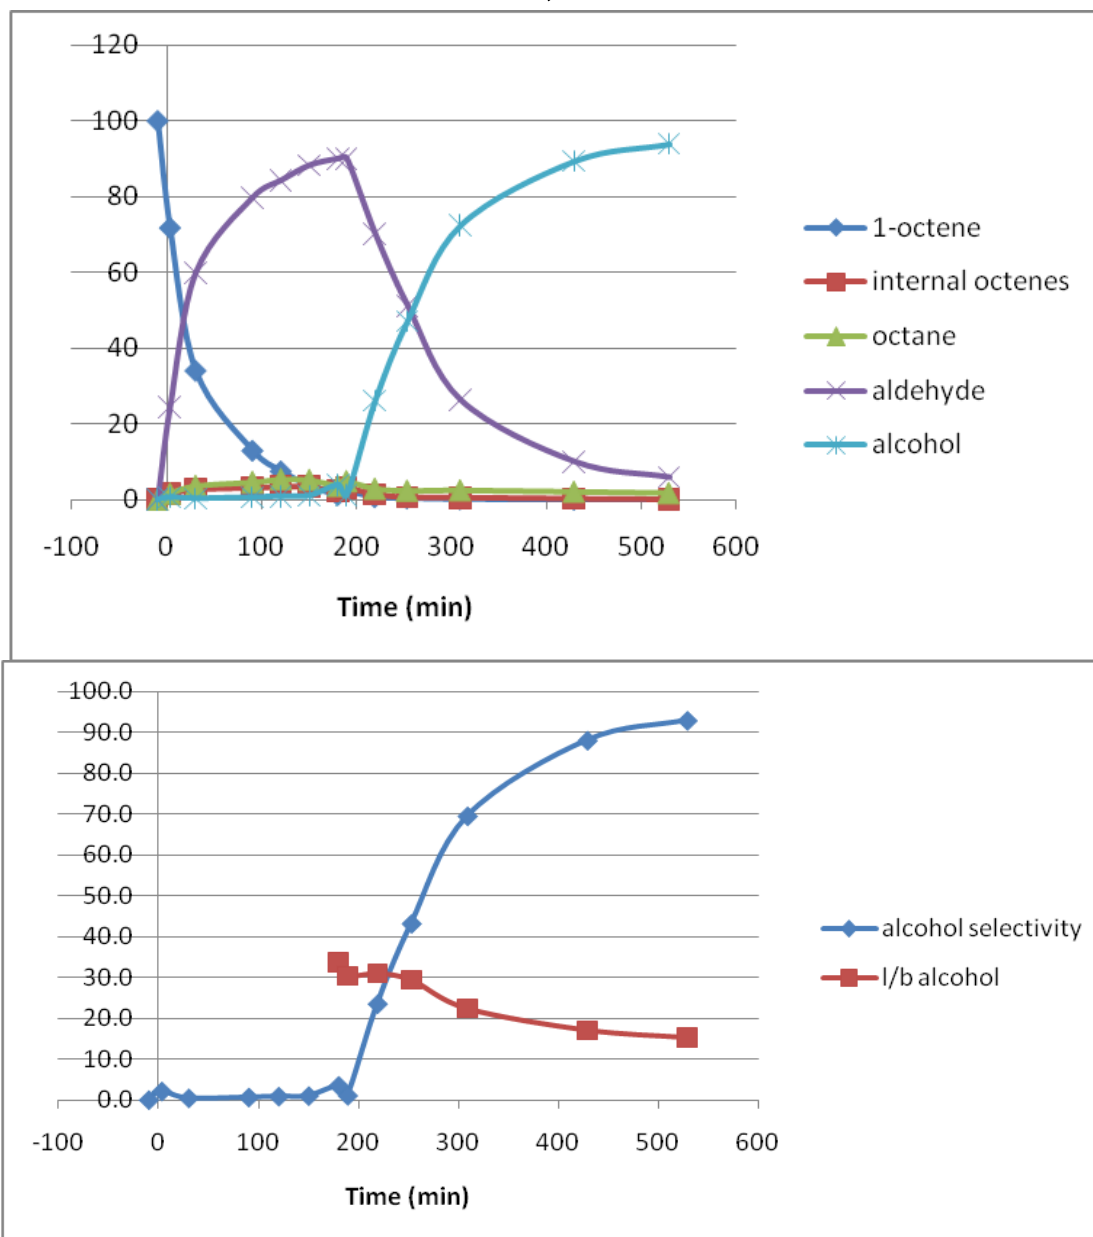



### Gas chromatograms of reaction Table 2, entry 3.

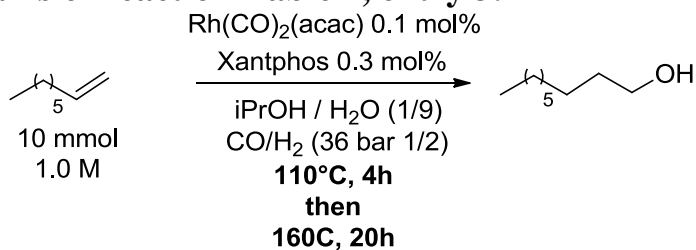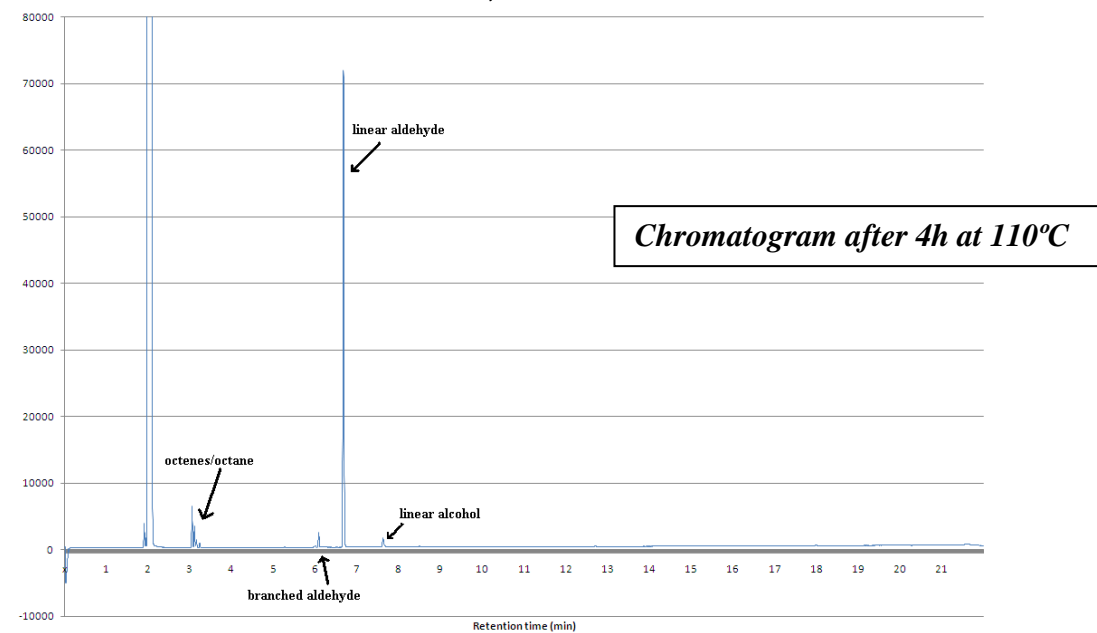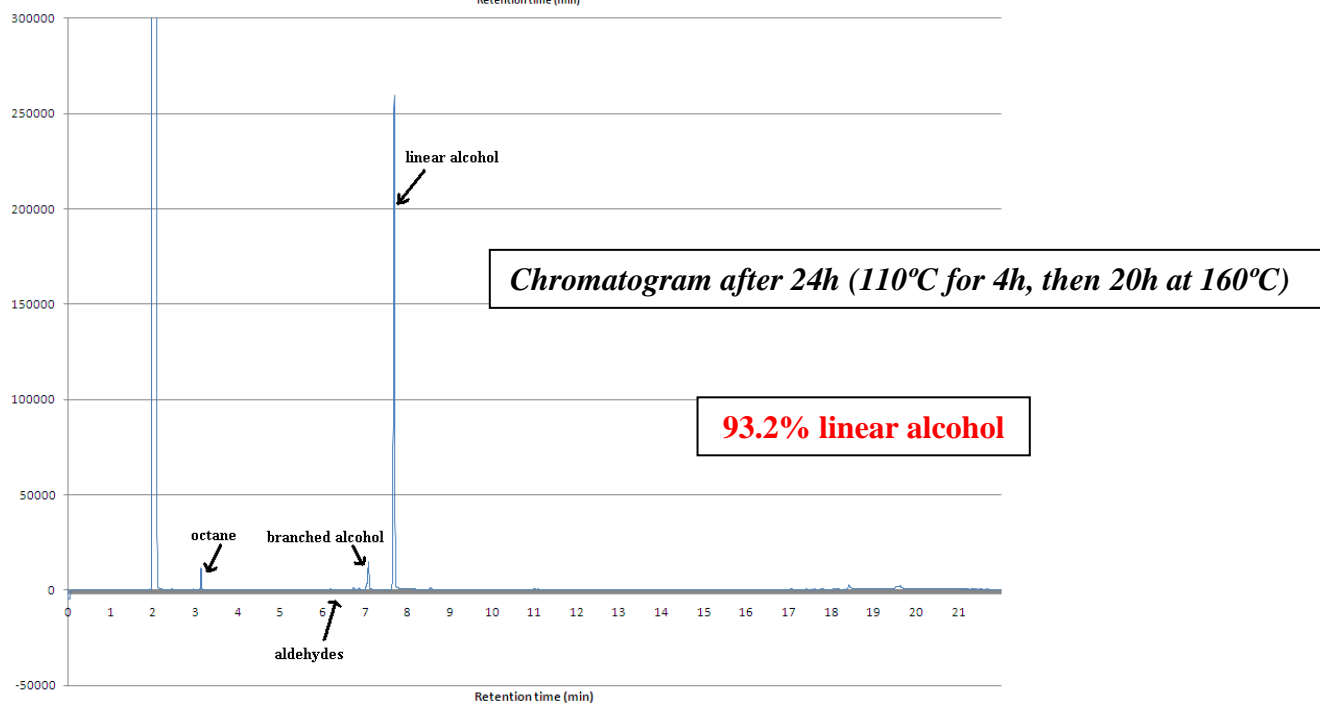

### Reaction profile of reaction Table 3, entries 3 and 4.

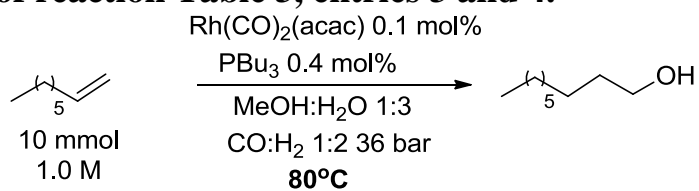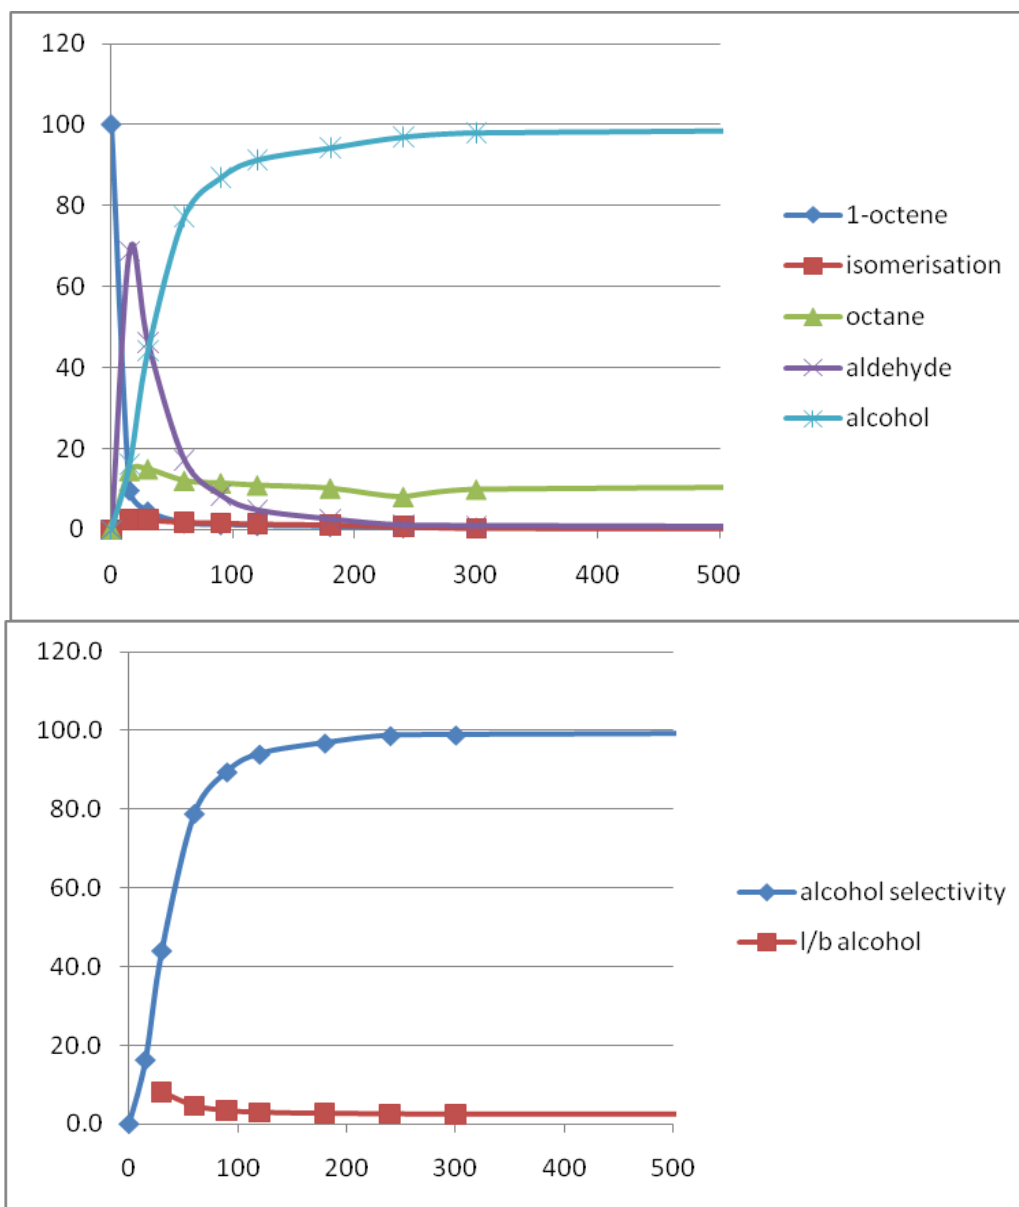

### Reaction profile of reaction Table 3, entry 5 (1-decene used as substrate).

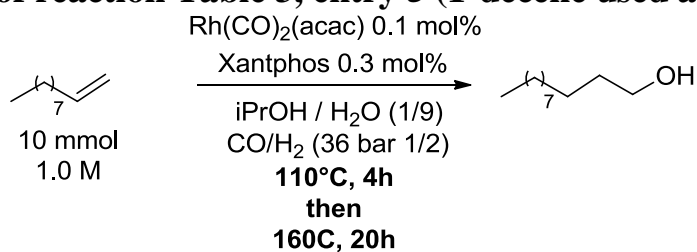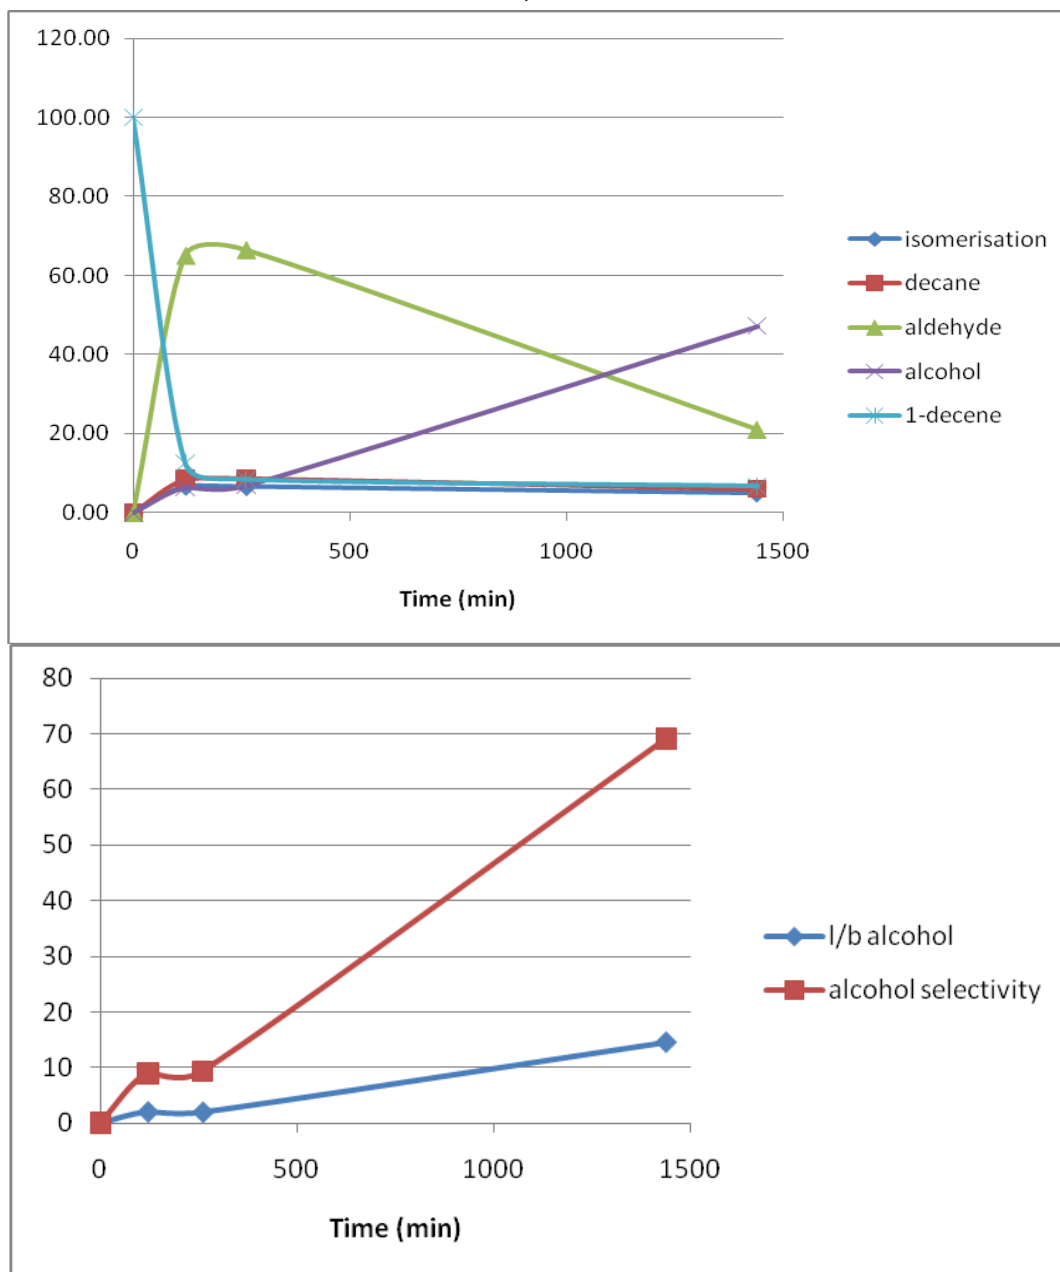

### Reaction profile of reaction Table 3, entry 6 (1-dodecene used as substrate).

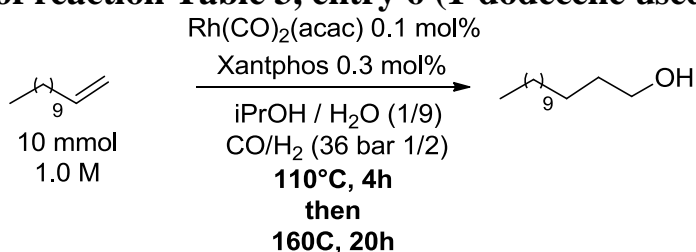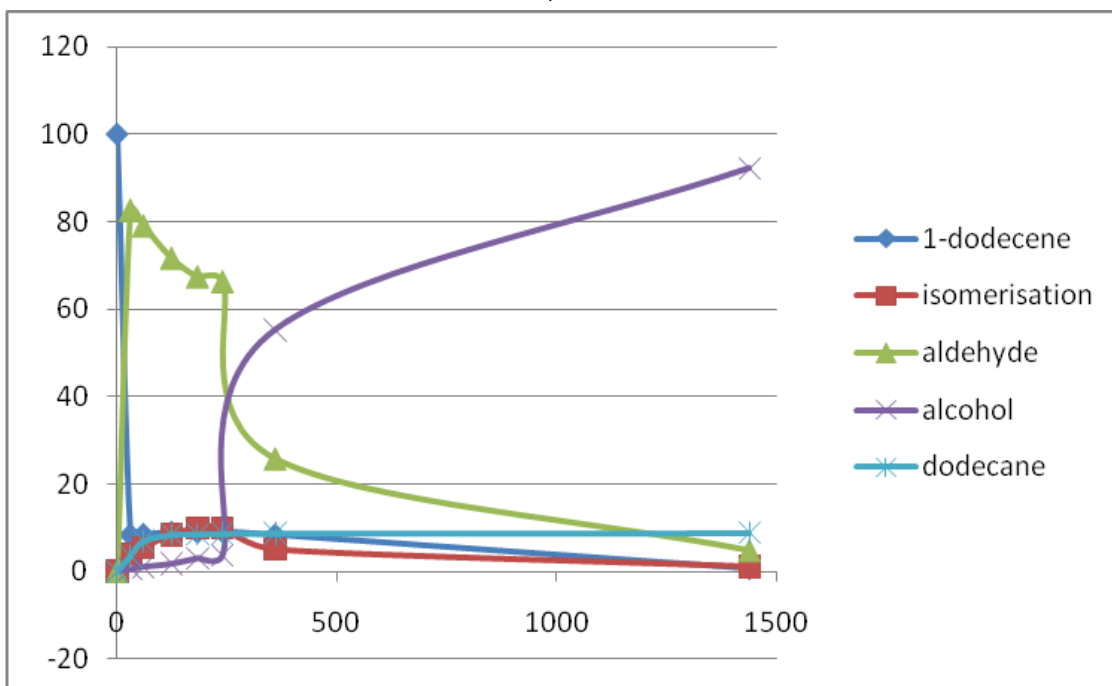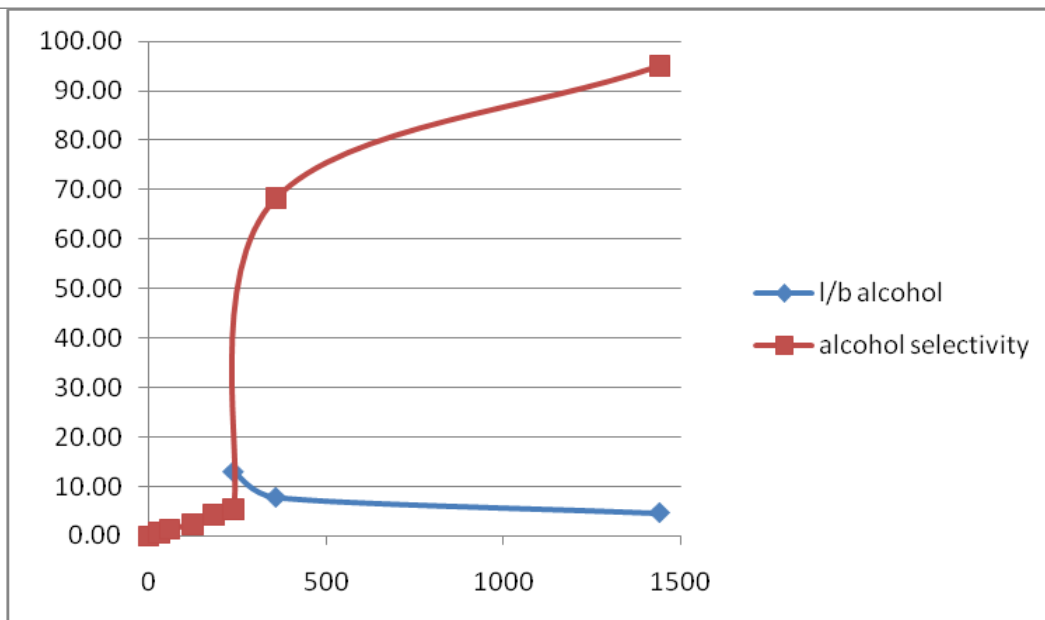

### Reaction profile of reaction Table 3, entry 7 (2-octene used as substrate).

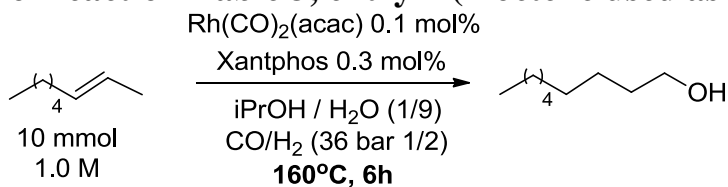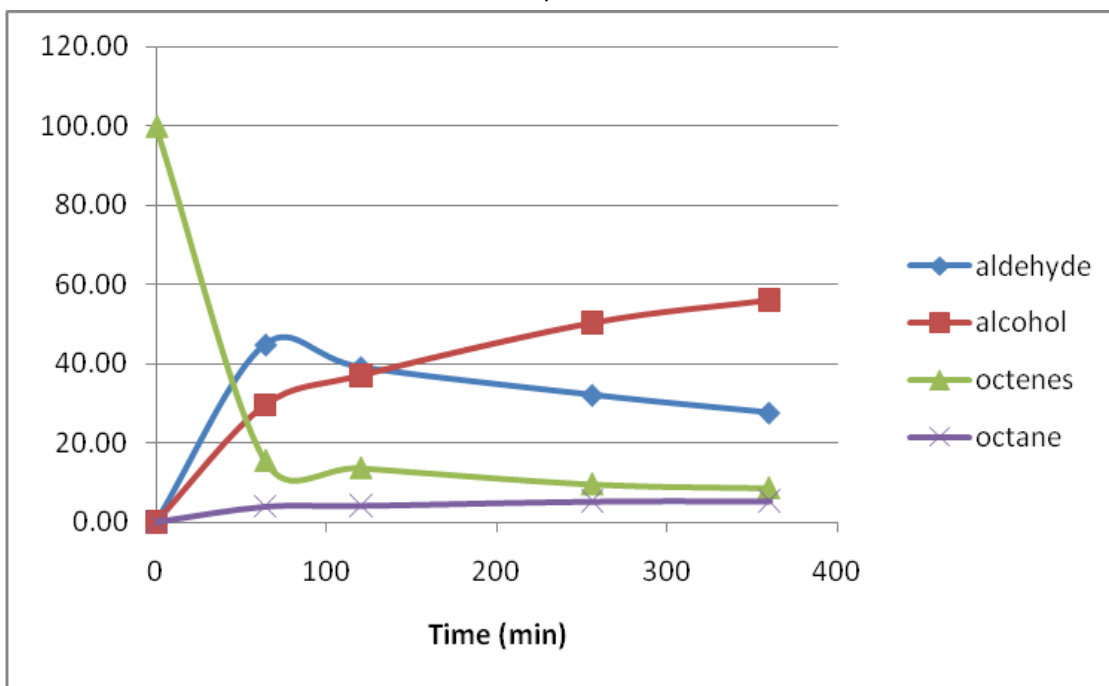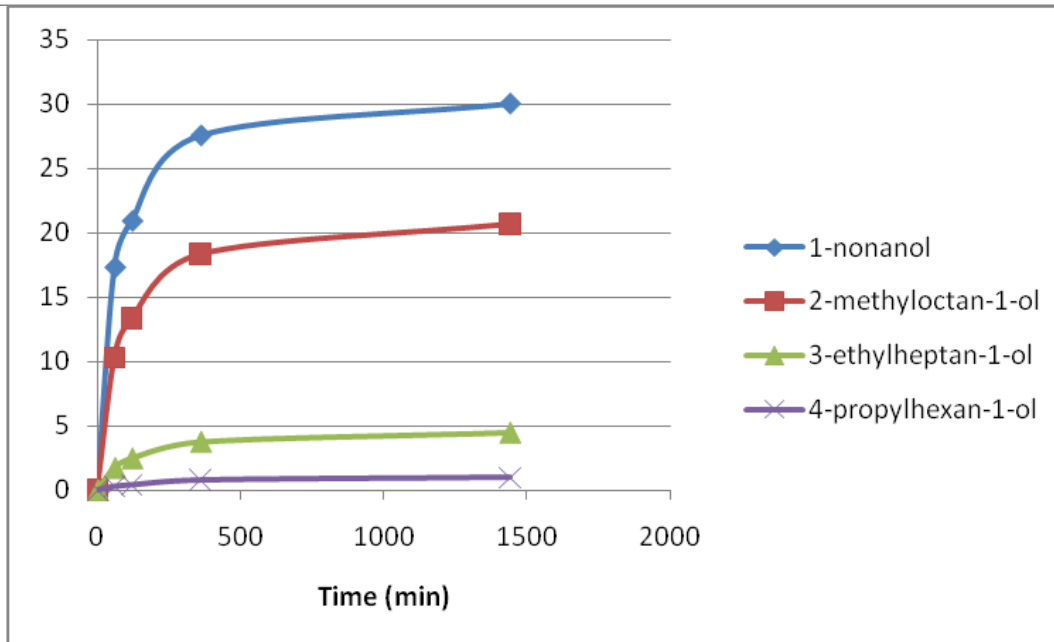

### Reaction profile of reaction Table 3, entries 8-9 (2-octene used as substrate).

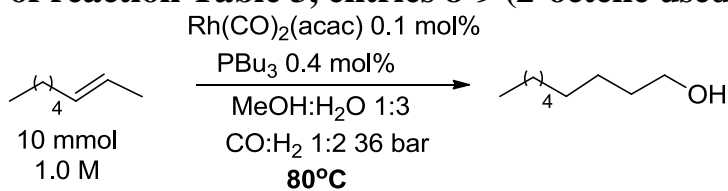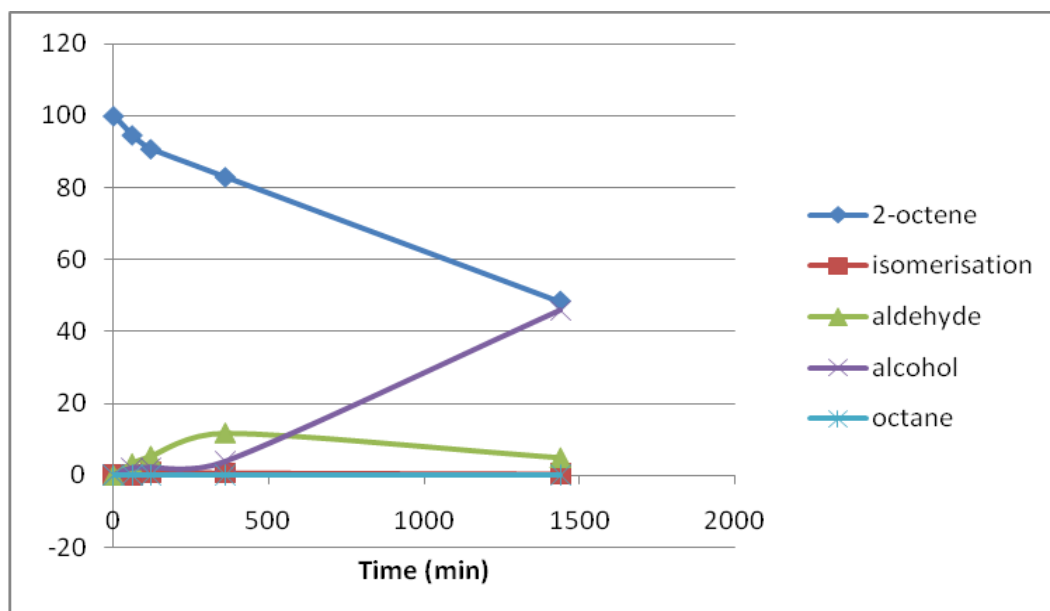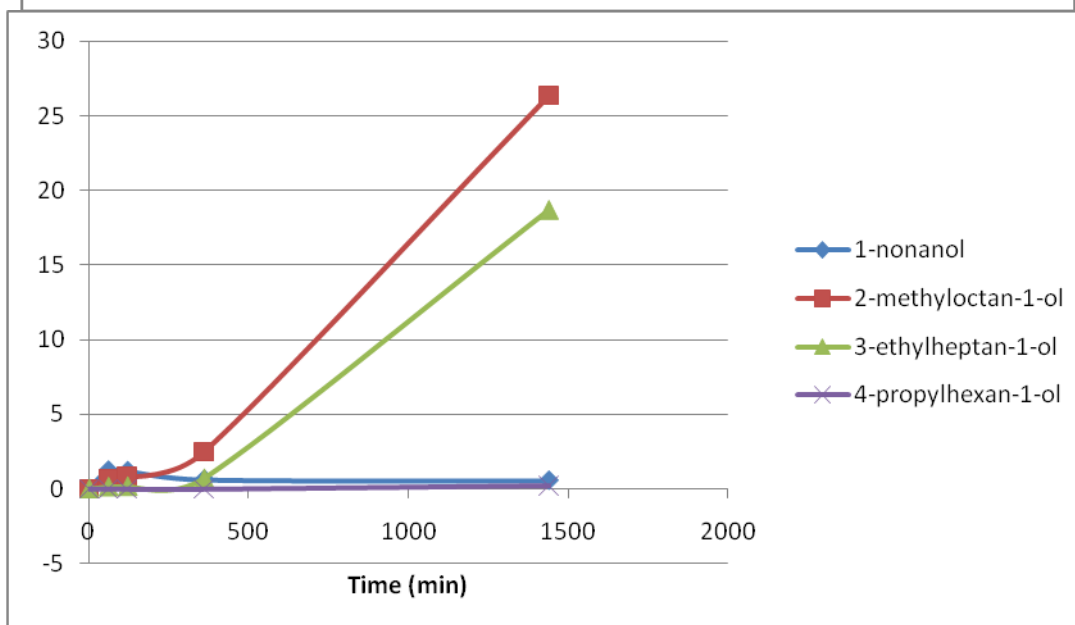

**Reaction profile of reaction Table 3, entries 10-11 (*cis*-cyclooctene used as substrate).**

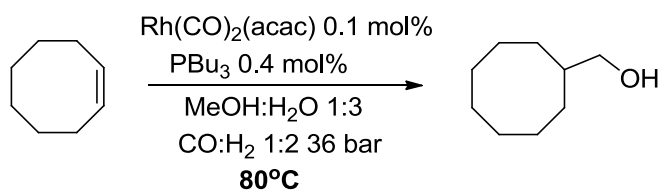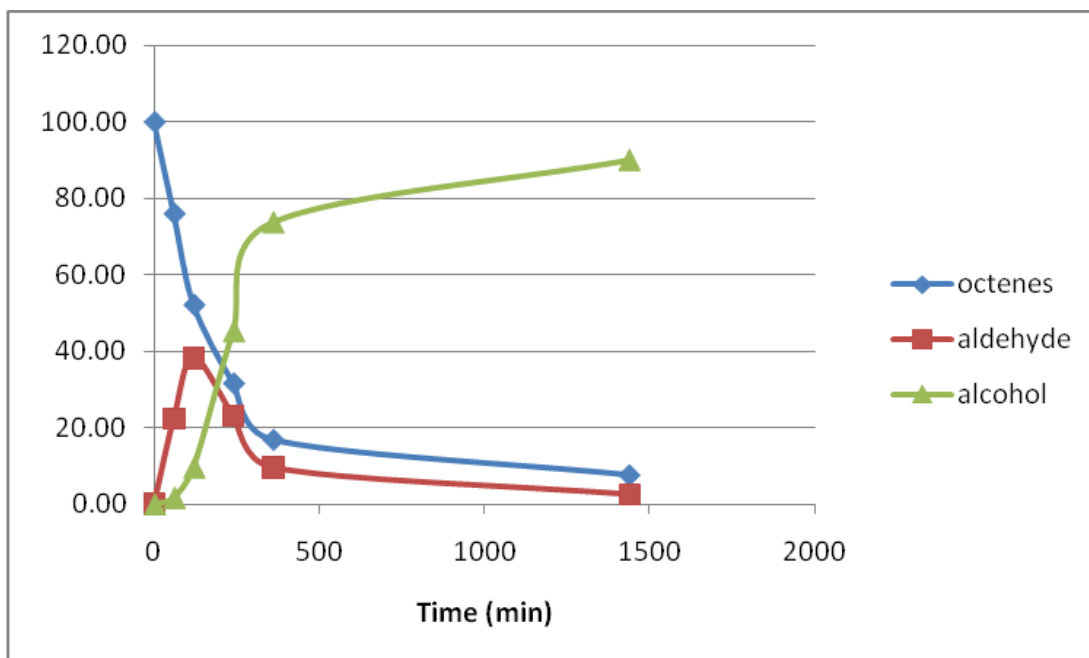

## Parameter screening for cobalt-catalyzed hydroformylation of 1-octene

**Table S7.** Pressure and temperature optimization using  $\text{Co}_2(\text{CO})_8$  as catalyst.

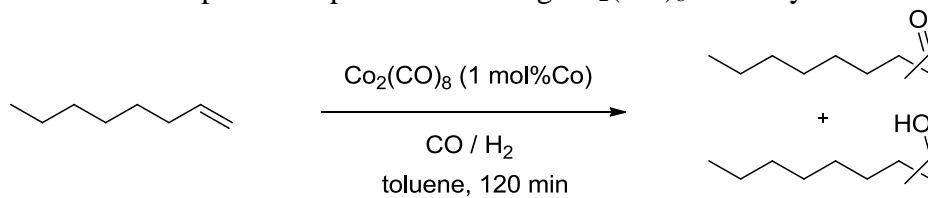

| entry | T <sup>o</sup> C | P(H <sub>2</sub> )<br>(bar) | P(CO)<br>(bar) | Conv. | octane | aldehyde/<br>alcohol | l/b<br>ratio* |
|-------|------------------|-----------------------------|----------------|-------|--------|----------------------|---------------|
| 1     | 170              | 50                          | 25             | 100   | 2.9    | 0.9                  | 1.0           |
| 2     | 170              | 24                          | 12             | 100   | 6.8    | 0.1                  | 1.0           |
| 3     | 150              | 24                          | 12             | 100   | 6.3    | 3.0                  | 1.0           |
| 4     | 130              | 24                          | 12             | 93.8  | 9.9    | 18.6                 | 1.4           |
| 5     | 110              | 24                          | 12             | 89.5  | 9.5    | 65.7                 | 1.8           |
| 6     | 110              | 18                          | 18             | 87.4  | 13.4   | >100                 | 1.7           |

\* ratio linear branched for combined aldehydes and alcohols products

**Table S8.** Various ligands at 110<sup>o</sup>C.

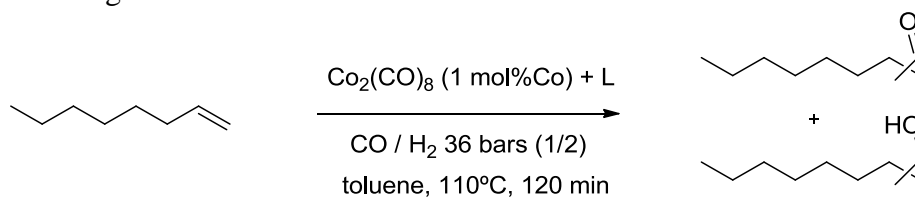

| entry | L (L/Co ratio)                     | Conv. | octane | aldehyde/<br>alcohol | l/b<br>ratio* |
|-------|------------------------------------|-------|--------|----------------------|---------------|
| 1     | None                               | 89.5  | 9.5    | 65.7                 | 1.8           |
| 2     | 2,6-Ph <sub>2</sub> -pyridine (4)  | 91.1  | 8.7    | >100                 | 2.0           |
| 3     | P <sup>n</sup> Bu <sub>3</sub> (1) | 0     | 0      | n.d.                 | n.d.          |
| 4     | IPr (1)                            | 0     | 0      | n.d.                 | n.d.          |
| 5     | NBD (10)                           | 91.9  | 9.5    | 82.3                 | 1.8           |
| 6     | PBr <sub>3</sub> (1)               | 4.0   | 0      | >100                 | n.d.          |

\* ratio linear branched for combined aldehydes and alcohols products

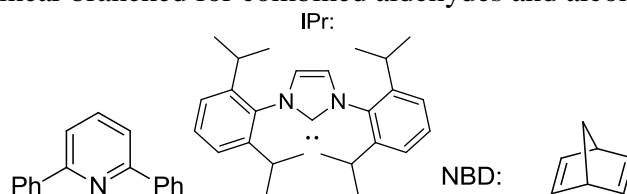



**Table S9.** Various ligands at 110°C and 150°C.

CCCCCCCC=C
 $\xrightarrow[\text{toluene, 120 min}]{\text{Co}_2(\text{CO})_8 (1 \text{ mol\%Co}) + \text{L}, \text{CO} / \text{H}_2 \text{ 36 bars (1/2)}}$ 
CCCCCCCC=O + CCCCCCCCO

| Entry | T°C | L (L/Co ratio)                                                                          | conv. | octane | aldehyde/<br>alcohol | l/b<br>ratio* |
|-------|-----|-----------------------------------------------------------------------------------------|-------|--------|----------------------|---------------|
| 1     | 110 | none                                                                                    | 89.5  | 9.5    | 65.7                 | 1.8           |
| 2     | 110 | P <sup>n</sup> Bu <sub>3</sub> (1)                                                      | 0     | 0      | n.d.                 | n.d.          |
| 3     | 150 | none                                                                                    | 100   | 6.3    | 3.0                  | 1.0           |
| 4     | 150 | P <sup>n</sup> Bu <sub>3</sub> (2)                                                      | 37    | 14     | 7.7                  | 7.5           |
| 5     | 150 | PPh <sub>3</sub> (2)                                                                    | 58.8  | 22     | 12.3                 | 2.2           |
| 6     | 150 | P(N-pyrrolyl) <sub>3</sub> (2)                                                          | 16.1  | 4.5    | >100                 | 1.2           |
| 7     | 150 | PPh <sub>2</sub> (2-OMe-C <sub>6</sub> H <sub>4</sub> ) (2)                             | 75.5  | 19.8   | 12.9                 | 1.7           |
| 8     | 150 | P(O-2,4- <sup>t</sup> Bu <sub>2</sub> -C <sub>6</sub> H <sub>3</sub> ) <sub>3</sub> (2) | 99.3  | 7.7    | 6.0                  | 1.4           |
| 9     | 150 | PCy <sub>3</sub> (2)                                                                    | 42.5  | 20.4   | 6.8                  | 5.9           |

\* ratio linear branched for combined aldehydes and alcohols products
